# Supplementary figures and images for: Nuclear localization of the transcriptional coactivator YAP is associated with invasive lobular breast cancer
Source: PubMed Central journal article supplement — Cell Oncol (Dordr). 2013 Aug 15;36(5):375–84. doi: 10.1007/s13402-013-0143-7 (PMC3777165; doi:10.1007/s13402-013-0143-7), 2013-08-15

Online Resource Fig. 1

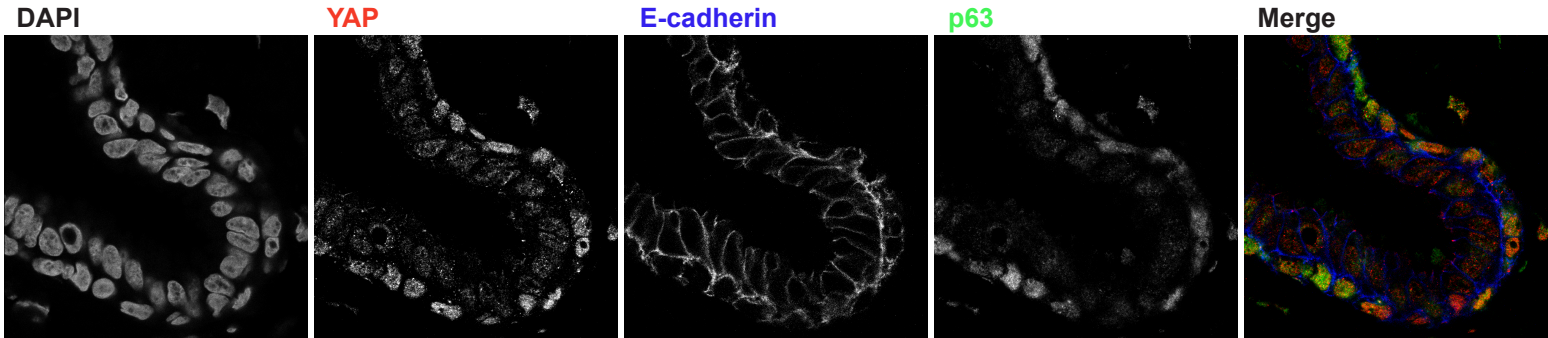

Supplement: 13402_2013_143_MOESM3_ESM.pdf [file 13402_2013_143_MOESM3_ESM.pdf]

### Online Resource Fig. 3

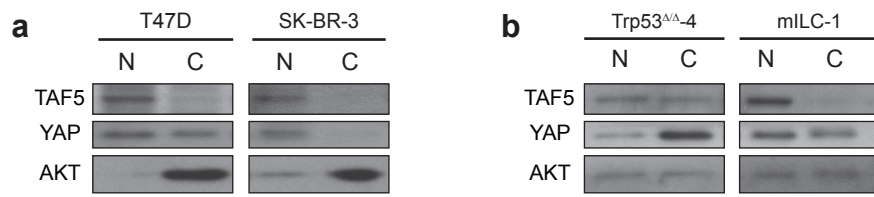

Supplement: 13402_2013_143_MOESM5_ESM.pdf [file 13402_2013_143_MOESM5_ESM.pdf]
