# Supplementary figures and images for: Nuclear localization of the transcriptional coactivator YAP is associated with invasive lobular breast cancer
Source: Springer Nature journal article supplement (doi:10.1007/s13402-013-0143-7), 2013-08-14

## Online Resource Fig. 2

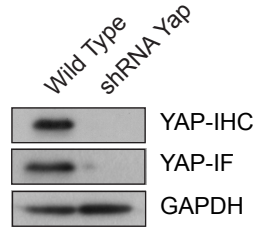

Supplement: MOESM4 [file 9269180]
